# Supplementary material for: Green synthesis of N-doped porous carbon/carbon dot composites as metal-free catalytic electrode materials for iodide-mediated quasi-solid flexible supercapacitors
Source: Royal Society of Chemistry journal article supplement (doi:10.1039/d2qi00017b), 2022-01-01
Supplement: d2qi00017b1.pdf [file d2qi00017b1.pdf]

## Supporting Information

# Green Synthesis of N doped Porous carbon/Carbon dots Composite as Metal-Free Catalytic Electrode Materials for Iodide Mediated Quasi-solid Flexible Supercapacitor

Rui Wang<sup>a</sup>, Hongju Wang<sup>a</sup>, Yi Zhou<sup>a</sup>, Zhiyong Gao<sup>b\*</sup>, Yue Han<sup>a</sup>, Kai Jiang<sup>ab\*</sup>, Wenchao Zhang<sup>c</sup>, Dapeng Wu<sup>a\*</sup>

<sup>a</sup> School of Environment, Henan Normal University, Key Laboratory for Yellow River and Huai River Water Environmental and Pollution Control, Ministry of Education, Henan Key Laboratory for Environmental Pollution Control, Xinxiang, Henan 453007, PR China.

<sup>b</sup> Collaborative Innovation Center of Henan Province for Green Manufacturing of Fine Chemicals, Key Laboratory of Green Chemical Media and Reactions, Ministry of Education, School of Chemistry and Chemical Engineering, Henan Normal University, Xinxiang, Henan 453007, P. R. China.

<sup>c</sup> Institute for Superconducting & Electronic Materials, School of Mechanical, Materials, Mechatronics & Biomedical Engineering, Faculty of Engineering and Information Sciences, University of Wollongong, NSW 2500, Australia.

### \*Corresponding author:

Dr. Dapeng Wu; E-mail: [dpengwu@126.com](mailto:dpengwu@126.com) or [dapengwu@htu.edu.cn](mailto:dapengwu@htu.edu.cn); Fax/Tel: +86 3733328629;  
Dr. Zhiyong Gao; E-mail: [zygao512@163.com](mailto:zygao512@163.com)

Kai Jiang; E-mail: [jiangkai6898@126.com](mailto:jiangkai6898@126.com); Fax/Tel: +86 3733328629 Address: Jianshe road, Xinxiang, Henan, P.R. China; Post code: 453007

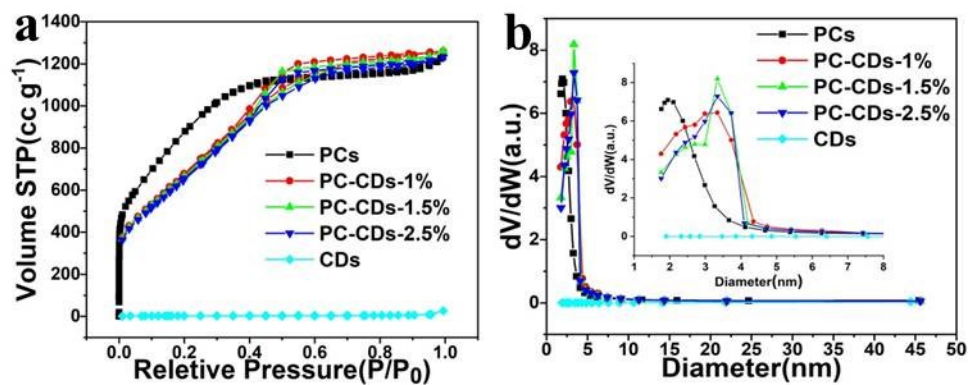

**Fig. S1** (a) N<sub>2</sub> adsorption-desorption curves and (b) pore size distribution for the PC, CDs and PC-CDs-1, PC-CDs-1.5%, PC-CDs-2.5

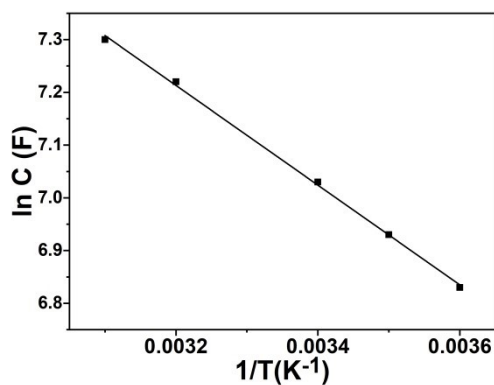

**Fig. S2** Electrochemical properties of PC-CDs-1.5% symmetrical capacitor in 1M H<sub>2</sub>SO<sub>4</sub>/0.06 M KI electrolyte systems at different temperatures for Arrhenius linear relationship curve

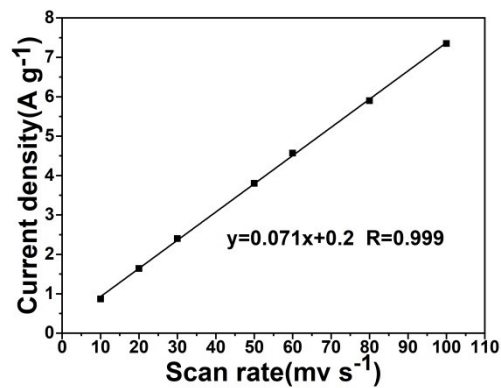

**Fig. S3** Electrochemical properties of PC-CDs-1.5% symmetrical capacitor in 1M H<sub>2</sub>SO<sub>4</sub> electrolyte for current response curves at different voltage sweep speeds

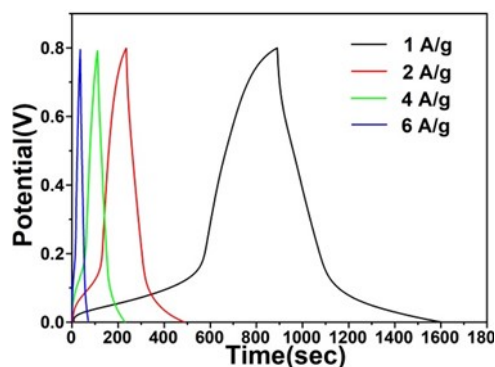

**Fig. S4** GCD curves of different current densities of PC-CDs-1.5% based symmetric supercapacitor in 1 M H<sub>2</sub>SO<sub>4</sub>/0.06 M KI electrolyte

The detailed capacitive performances of the PC-CDs-1.5% supercapacitor were further investigated, Fig. S4 display the GCDs of the supercapacitor in 1 M H<sub>2</sub>SO<sub>4</sub>/0.06 M KI electrolyte at different current densities. At 1, 2, 4 and 6 A g<sup>-1</sup>, the specific capacitances of the PC-CDs-1.5% supercapacitor are 1783, 1270, 810, and 525 F g<sup>-1</sup>, respectively, and the rapid decay is common for redox electrolyte mediated supercapacitors. Despite this, the substantially enhanced capacitance is highly valuable for output performance of supercapacitor.

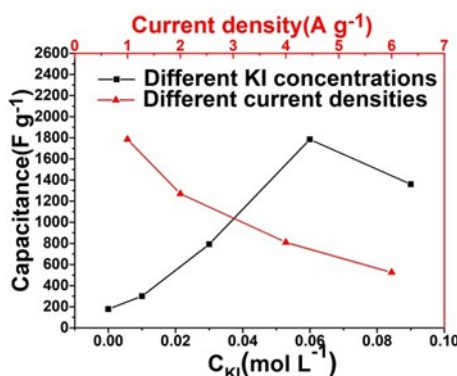

**Fig. S5** PC-CDs-1.5% based symmetric supercapacitor at different KI concentrations vs 0.06M KI at different current densities

Fig. S5 exhibits the capacitance performance of PC-CDs-1.5% symmetric device at different KI concentrations with 1 A g<sup>-1</sup>, and in electrolytes with 0.06 M KI concentrations at different current densities. It can be intuitively seen from the diagram that the capacitance reaches the maximum value at 0.06 M KI, and the capacitance tends to rise when towards 0.06 M. When the KI concentrations exceed 0.06 M, it begins to presented with a downward trend, which is consistent with the force between the concentration of ions in the solution.

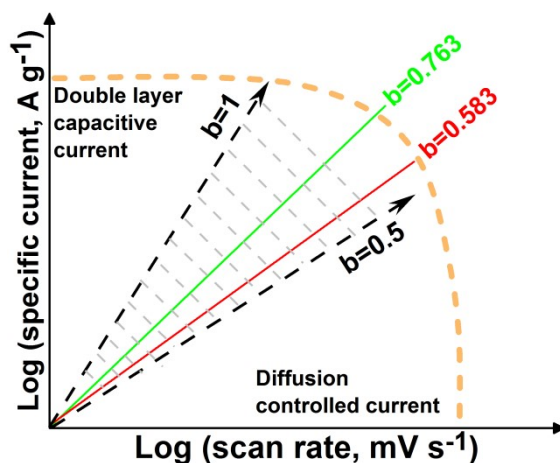

Fig. S6 The fitting plots between  $\log(i)$  and  $\log(v)$

In order to further confirm the nature of the charge-storage process and illustrate the relationship of current and scan rate of the PC-CDs-1.5% solid state supercapacitor, we investigated it by a mathematical analysis (Dunn's method). In general,  $b$  values between 0.5 and 1.0 have been observed, which suggests a mixture of diffusion-controlled and capacitor-like responses. The  $b$  values of PC-CDs-1.5% solid state supercapacitor were calculated to be 0.763 and 0.583 (Fig. S6), which indicates the mainly diffusion-controlled charge storage process.
